# Supplementary material for: Children diagnosed with presymptomatic type 1 diabetes through public health screening have milder diabetes at clinical manifestation
Source: Springer Nature journal article supplement (doi:10.1007/s00125-023-05953-0), 2023-06-17

## Electronic Supplemental Material

### **Hummel et al: Children diagnosed with presymptomatic type 1 diabetes through public health screening have milder diabetes at clinical manifestation**

#### Table of contents:

- ESM Table 1. Clinical presentation at diagnosis of stage 3 type 1 diabetes relative to age at diagnosis in children previously diagnosed with presymptomatic type 1 diabetes in the Fr1da study compared with children diagnosed with incident type 1 diabetes in the DiMelli study who had not participated in prior screening.
- ESM Table 2. Clinical presentation at diagnosis of stage 3 type 1 diabetes in children with C-peptide levels  $\geq 0.2$  nmol/l at stage 3 diagnosis who were previously diagnosed with presymptomatic type 1 diabetes in the Fr1da study compared with children diagnosed with incident type 1 diabetes in the DiMelli study without prior screening.
- ESM Table 3. Complete case multivariate regression analysis on the effect of diagnosis of presymptomatic diabetes in the Fr1da study (N=15) on clinical presentation at diagnosis of stage 3 type 1 diabetes compared to children diagnosed with incident type 1 diabetes in the DiMelli study (N=572) without prior screening.
- ESM Table 4. Clinical presentation at diagnosis of stage 3 type 1 diabetes relative to participation in metabolic staging and education in children previously diagnosed with presymptomatic type 1 diabetes in the Fr1da study.
- ESM Table 5. Clinical presentation at diagnosis of stage 3 type 1 diabetes relative to family history of type 1 diabetes in children previously diagnosed with presymptomatic type 1 diabetes in the Fr1da study compared with children diagnosed with incident type 1 diabetes in the DiMelli study who had not participated in prior screening.
- ESM Table 6. Clinical presentation at diagnosis of stage 3 type 1 diabetes before versus during the COVID-19 pandemic in children previously diagnosed with presymptomatic type 1 diabetes in the Fr1da study.
- ESM Figure 1. Fr1da study participants
- ESM Figure 2. HbA<sub>1c</sub>, fasting glucose, fasting C-peptide and BMI-SDS at diagnosis of stage 3 type 1 diabetes are shown for children with a first-degree relative with type 1 diabetes previously diagnosed with presymptomatic type 1 diabetes in the Fr1da study

compared with children with a first-degree relative with type 1 diabetes diagnosed with incident type 1 diabetes in the DiMelli study.

**ESM Table 1** Clinical presentation at diagnosis of stage 3 type 1 diabetes relative to age at diagnosis in children previously diagnosed with presymptomatic type 1 diabetes in the Fr1da study compared with children diagnosed with incident type 1 diabetes in the DiMelli study who had not participated in prior screening.

|                                                  | Fr1da |                       | DiMelli |                       | p-value |
|--------------------------------------------------|-------|-----------------------|---------|-----------------------|---------|
|                                                  | n     | Median (IQR) or n (%) | n       | Median (IQR) or n (%) |         |
| <b>Age at stage 3 T1D diagnosis &lt; 6 years</b> |       |                       |         |                       |         |
| Age at diagnosis (years)                         | 51    | 4.7 (3.3-5.3)         | 281     | 3.8 (2.3-5.0)         | <0.01   |
| Sex                                              | 51    |                       | 281     |                       | 0.8     |
| Female                                           |       | 25 (49.0)             |         | 145 (51.6)            |         |
| Male                                             |       | 26 (51.0)             |         | 136 (48.4)            |         |
| Clinical parameters at diagnosis                 |       |                       |         |                       |         |
| HbA <sub>1c</sub> (mmol/mol)                     | 49    | 49 (45-60)            | 245     | 84 (69-97)            | <0.001* |
| HbA <sub>1c</sub> (%)                            | 49    | 6.6 (6.3-7.6)         | 245     | 9.8 (8.5-11.0)        | <0.001* |
| Fasting glucose (mmol/l)                         | 23    | 5.1 (4.4-5.9)         | 261     | 6.5 (5.0-8.5)         | 0.7*    |
| Fasting C-Peptide (nmol/l)                       | 38    | 0.18 (0.14-0.26)      | 253     | 0.07 (0-0.13)         | <0.001* |
| Insulin treatment                                | 49    | 35 (71.4)             | 281     | 278 (98.9)            | <0.001* |
| Ketonuria (moderate/large)                       | 24    | 3 (12.5)              | 263     | 197 (74.9)            | <0.001* |
| DKA                                              | 50    | 1 (2.0)               |         |                       |         |
| pH                                               | 32    | 7.40 (7.39-7.42)      |         |                       |         |
| Symptoms                                         | 49    | 24 (49.0)             |         |                       |         |
| Hospitalisation                                  | 49    | 39 (79.6)             |         |                       |         |
| Days                                             | 47    | 9 (4-12)              |         |                       |         |
| Intensive care unit (yes)                        | 47    | 1 (2.1)               |         |                       |         |
| <b>Age at stage 3 T1D diagnosis ≥ 6 years</b>    |       |                       |         |                       |         |
| Age at diagnosis (years)                         | 77    | 8.5 (7.0-10.3)        | 455     | 8.8 (7.5-10.0)        | 0.6     |
| Sex                                              | 77    |                       | 455     |                       | 0.6     |
| Female                                           |       | 34 (44.2)             |         | 217 (47.7)            |         |
| Male                                             |       | 43 (55.8)             |         | 238 (52.3)            |         |
| Clinical parameters at diagnosis                 |       |                       |         |                       |         |
| HbA <sub>1c</sub> (mmol/mol)                     | 71    | 51 (44-73)            | 422     | 95 (80-112)           | <0.001* |
| HbA <sub>1c</sub> (%)                            | 71    | 6.8 (6.2-8.8)         | 422     | 10.8 (9.5-12.4)       | <0.001* |
| Fasting glucose (mmol/l)                         | 29    | 5.4 (5.1-6.4)         | 436     | 7.5 (6.1-9.5)         | <0.05*  |
| Fasting C-Peptide (nmol/l)                       | 51    | 0.25 (0.16-0.37)      | 428     | 0.10 (0.07-0.17)      | <0.001* |
| Insulin treatment                                | 70    | 51 (72.9)             | 455     | 444 (97.6)            | <0.001* |
| Ketonuria (moderate/large)                       | 30    | 9 (30.0)              | 427     | 344 (80.6)            | <0.001* |
| DKA                                              | 68    | 2 (2.9)               |         |                       |         |
| pH                                               | 36    | 7.40 (7.37-7.42)      |         |                       |         |
| Symptoms                                         | 72    | 29 (40.3)             |         |                       |         |
| Hospitalisation                                  | 72    | 51 (70.8)             |         |                       |         |
| Days                                             | 70    | 8 (0-10)              |         |                       |         |
| Intensive care unit (yes)                        | 61    | 1 (1.6)               |         |                       |         |

\*adjusted for sex, having a first-degree relative with type 1 diabetes, age at and calendar year at stage 3 diagnosis; T1D: type 1 diabetes, DKA: diabetic ketoacidosis

**ESM Table 2** Clinical presentation at diagnosis of stage 3 type 1 diabetes in children with C-peptide levels  $\geq 0.2$  nmol/l at stage 3 diagnosis who were previously diagnosed with presymptomatic type 1 diabetes in the Fr1da study compared with children diagnosed with incident type 1 diabetes in the DiMelli study without prior screening.

|                               | Fr1da children<br>with C-peptide $\geq 0.2$ nmol/l at<br>stage 3 diagnosis |                       | DiMelli children<br>with C-peptide $\geq 0.2$ nmol/l at<br>stage 3 diagnosis |                       | Adjusted<br>p-value* |
|-------------------------------|----------------------------------------------------------------------------|-----------------------|------------------------------------------------------------------------------|-----------------------|----------------------|
|                               | n                                                                          | Median (IQR) or n (%) | n                                                                            | Median (IQR) or n (%) |                      |
| HbA <sub>1c</sub> (mmol/mol)  | 51                                                                         | 46 (41; 54)           | 121                                                                          | 80 (63; 96)           | <0.001               |
| HbA <sub>1c</sub> (%)         | 51                                                                         | 6.4 (5.9; 7.1)        | 121                                                                          | 9.5 (8.0; 10.9)       | <0.001               |
| Fasting glucose<br>(mmol/l)   | 27                                                                         | 5.4 (5.1; 6.3)        | 119                                                                          | 7.1 (5.8; 8.9)        | 0.1                  |
| Fasting C-peptide<br>(nmol/l) | 52                                                                         | 0.30 (0.22;0.44)      | 128                                                                          | 0.26 (0.20; 0.33)     | 0.1                  |
| Insulin treatment             | 49                                                                         | 26 (53.1)             | 128                                                                          | 121 (94.5)            | <0.05                |
| Ketonuria<br>(moderate/large) | 19                                                                         | 1 (5.3)               | 115                                                                          | 75 (65.2)             | <0.05                |
| BMI-SDS                       | 29                                                                         | 0.12 (-0.50; 1.74)    | 127                                                                          | 0.02 (-0.85;0.93)     | 0.2                  |

\* adjusted for sex, age and calendar year at stage 3 type 1 diabetes diagnosis, having a first-degree relative with type 1 diabetes

**ESM Table 3** Complete case multivariate regression analysis on the effect of diagnosis of presymptomatic diabetes in the Fr1da study (N=15) on clinical presentation at diagnosis of stage 3 type 1 diabetes compared to children diagnosed with incident type 1 diabetes in the DiMelli study (N=572) without prior screening.

|                               | Fr1da<br>Median (IQR) or n (%) | DiMelli<br>Median (IQR) or n (%) | $\beta$ – Estimate<br>(95% CI) | Odds Ratio<br>(95% CI) | Adjusted<br>p-value* |
|-------------------------------|--------------------------------|----------------------------------|--------------------------------|------------------------|----------------------|
| HbA <sub>1c</sub> (mmol/mol)  | 51 (39; 63)                    | 92 (77; 108)                     | -41 (-53; -30)                 |                        | <0.001               |
| HbA <sub>1c</sub> (%)         | 6.8 (5.7; 7.9)                 | 10.6 (9.2; 12.0)                 | -3.8 (-4.9; -2.7)              |                        | <0.001               |
| Fasting glucose (mmol/l)      | 5.3 (4.8; 7.5)                 | 7.2 (5.8-9.1)                    | -0.2 (-1.8; 1.5)               |                        | 0.8                  |
| Fasting C-Peptide (nmol/l)    |                                |                                  |                                |                        |                      |
| Median (IQR)                  | 0.18 (0.13; 0.21)              | 0.10 (0; 0.17)                   | 0.12 (0.05; 0.18)              |                        | <0.001               |
| $\geq 0.2$ nmol/l             | 7 (46.7)                       | 100 (17.5)                       |                                | 12.0 (3.4; 42.0)       | <0.001               |
| $> 0.075$ nmol/l              | 13 (86.7)                      | 341 (59.6)                       |                                | 9.3 (1.9; 45.1)        | <0.01                |
| Insulin treatment             | 11 (73.3)                      | 564 (98.6)                       |                                | 0.02 (0.002; 0.17)     | <0.001               |
| Ketonuria<br>(moderate/large) | 2 (13.3)                       | 445 (77.8)                       |                                | 0.05 (0.01; 0.25)      | <0.001               |
| BMI-SDS                       | 0.20 (-0.56; 0.75)             | -0.62 (-1.43; 0.23)              | 0.90 (0.18; 1.62)              |                        | <0.05                |

\*Adjusted for sex, having a first-degree relative with type 1 diabetes, age and calendar year at stage 3 type 1 diabetes diagnosis

**ESM Table 4** Clinical presentation at diagnosis of stage 3 type 1 diabetes relative to participation in metabolic staging and education in children previously diagnosed with presymptomatic type 1 diabetes in the Fr1da study.

|                                                            | Children underwent<br>metabolic staging and<br>education |                          | Metabolic staging<br>and education<br>pending/declined |                          |         |
|------------------------------------------------------------|----------------------------------------------------------|--------------------------|--------------------------------------------------------|--------------------------|---------|
|                                                            | n                                                        | Median (IQR) or<br>n (%) | n                                                      | Median (IQR) or<br>n (%) | p-value |
| Age at diagnosis of stage 3<br>T1D (years)                 | 114                                                      | 6.7 (5.0-9.3)            | 14                                                     | 6.7 (4.9-7.7)            | 0.3     |
| Sex                                                        | 114                                                      |                          | 14                                                     |                          | 0.6     |
| Female                                                     |                                                          | 54 (47.4)                |                                                        | 5 (35.7)                 |         |
| Male                                                       |                                                          | 60 (52.6)                |                                                        | 9 (64.3)                 |         |
| <b>Clinical parameters at<br/>diagnosis of stage 3 T1D</b> |                                                          |                          |                                                        |                          |         |
| HbA <sub>1c</sub> (mmol/mol)                               | 110                                                      | 51 (44-63)               | 10                                                     | 72 (52-92)               | <0.01   |
| HbA <sub>1c</sub> (%)                                      | 110                                                      | 6.8 (6.2-7.9)            | 10                                                     | 8.7 (6.9-10.6)           | <0.01   |
| Insulin treatment                                          | 108                                                      | 75 (69.4)                | 11                                                     | 11 (100)                 | 0.1     |
| DKA                                                        | 107                                                      | 2 (1.9)                  | 11                                                     | 1 (9.1)                  | 0.3     |
| Symptoms                                                   | 108                                                      | 42 (38.9)                | 13                                                     | 11 (84.6)                | <0.01   |
| Hospitalisation                                            |                                                          |                          |                                                        |                          |         |
| Days                                                       | 106                                                      | 8 (0-10)                 | 11                                                     | 11 (9-15)                | <0.01   |
| Intensive care unit (yes)                                  | 97                                                       | 2 (2.1)                  | 11                                                     | 0                        | 0.2     |

T1D: type 1 diabetes, DKA: diabetic ketoacidosis

**ESM Table 5** Clinical presentation at diagnosis of stage 3 type 1 diabetes relative to family history of type 1 diabetes in children previously diagnosed with presymptomatic type 1 diabetes in the Fr1da study compared with children diagnosed with incident type 1 diabetes in the DiMelli study who had not participated in prior screening.

|                                                        | Fr1da                                        |                       |                                                 | Fr1da                 |         |  | DiMelli                                      |                       |  | DiMelli                                         |                       |         |
|--------------------------------------------------------|----------------------------------------------|-----------------------|-------------------------------------------------|-----------------------|---------|--|----------------------------------------------|-----------------------|--|-------------------------------------------------|-----------------------|---------|
|                                                        | Children with first-degree relative with T1D |                       | Children without first-degree relative with T1D |                       | p-value |  | Children with first-degree relative with T1D |                       |  | Children without first-degree relative with T1D |                       | p-value |
|                                                        | n                                            | Median (IQR) or n (%) | n                                               | Median (IQR) or n (%) |         |  | n                                            | Median (IQR) or n (%) |  | n                                               | Median (IQR) or n (%) |         |
| Age at diagnosis of stage 3 T1D (years)                | 18                                           | 8.3 (4.8-11.2)        | 110                                             | 6.7 (5.0-8.7)         | 0.2     |  | 49                                           | 6.5 (3.9-9.4)         |  | 683                                             | 7.3 (4.5-9.2)         | 0.5     |
| Sex                                                    | 18                                           |                       | 110                                             |                       | 0.2     |  | 49                                           |                       |  | 683                                             |                       | 0.6     |
| Female                                                 |                                              | 6 (33.3)              |                                                 | 53 (48.2)             |         |  |                                              | 22 (44.9)             |  |                                                 | 338 (49.5)            |         |
| Male                                                   |                                              | 12 (66.7)             |                                                 | 57 (51.8)             |         |  |                                              | 27 (55.1)             |  |                                                 | 345 (50.5)            |         |
| <b>Clinical parameters at diagnosis of stage 3 T1D</b> |                                              |                       |                                                 |                       |         |  |                                              |                       |  |                                                 |                       |         |
| HbA <sub>1c</sub> (mmol/mol)                           | 18                                           | 50 (43-65)            | 102                                             | 51 (45-67)            | 0.6     |  | 44                                           | 78 (67-89)            |  | 620                                             | 92 (77-108)           | <0.001  |
| HbA <sub>1c</sub> (%)                                  | 18                                           | 6.7 (6.1-8.1)         | 102                                             | 6.8 (6.3-8.3)         | 0.6     |  | 44                                           | 9.3 (8.3-10.3)        |  | 620                                             | 10.6 (9.2-12.0)       | <0.001  |
| Fasting glucose (mmol/l)                               | 7                                            | 5.4 (4.8-6.9)         | 45                                              | 5.3 (4.6-6.3)         | 0.5     |  | 49                                           | 5.6 (4.7-7.5)         |  | 645                                             | 7.2 (5.8-9.2)         | <0.001  |
| Fasting C-Peptide (nmol/l)                             | 12                                           | 0.22 (0.16-0.56)      | 77                                              | 0.21 (0.13-0.31)      | 0.3     |  | 48                                           | 0.10 (0.0-0.17)       |  | 630                                             | 0.10 (0.0-0.17)       | 0.6     |
| Insulin treatment                                      | 18                                           | 12 (66.7)             | 101                                             | 74 (73.3)             | 0.6     |  | 49                                           | 47 (95.9)             |  | 683                                             | 671 (98.2)            | 0.2     |
| Ketonuria (moderate/large)                             | 8                                            | 2 (25.0)              | 46                                              | 10 (21.7)             | 0.8     |  | 43                                           | 22 (51.2)             |  | 643                                             | 515 (80.1)            | <0.001  |
| DKA                                                    | 18                                           | 0 (0)                 | 100                                             | 3 (3.0)               | 0.5     |  |                                              |                       |  |                                                 |                       |         |
| pH                                                     | 10                                           | 7.39 (7.38-7.42)      | 58                                              | 7.40 (7.38-7.42)      | 0.9     |  |                                              |                       |  |                                                 |                       |         |
| Symptoms                                               | 18                                           | 8 (44.4)              | 103                                             | 45 (43.7)             | 1.0     |  |                                              |                       |  |                                                 |                       |         |
| Hospitalisation                                        | 18                                           | 13 (72.2)             | 103                                             | 77 (74.8)             | 0.8     |  |                                              |                       |  |                                                 |                       |         |
| Days                                                   | 17                                           | 7 (0-8.5)             | 100                                             | 9 (0-11.8)            | 0.1     |  |                                              |                       |  |                                                 |                       |         |
| Intensive care unit (yes)                              | 17                                           | 0 (0)                 | 91                                              | 2 (2.2)               | 0.4     |  |                                              |                       |  |                                                 |                       |         |

T1D: type 1 diabetes, DKA: diabetic ketoacidosis

**ESM Table 6** Clinical presentation at diagnosis of stage 3 type 1 diabetes before versus during the COVID-19 pandemic in children previously diagnosed with presymptomatic type 1 diabetes in the Fr1da study.

|                                                        | Stage 3 Diagnosis<br>8/2015 -2/2020 |                          | Stage 3 Diagnosis<br>3/2020 – 11/2022 |                          | p-value |
|--------------------------------------------------------|-------------------------------------|--------------------------|---------------------------------------|--------------------------|---------|
|                                                        | n                                   | Median (IQR) or<br>n (%) | n                                     | Median (IQR) or<br>n (%) |         |
| Age at diagnosis of stage 3 T1D (years)                | 56                                  | 5.5 (3.9-7.3)            | 72                                    | 8.0 (5.9-10.2)           | <0.001  |
| Sex                                                    | 56                                  |                          | 72                                    |                          | 0.3     |
| Female                                                 |                                     | 29 (51.8)                |                                       | 30 (41.7)                |         |
| Male                                                   |                                     | 27 (48.2)                |                                       | 42 (58.3)                |         |
| <b>Clinical parameters at diagnosis of stage 3 T1D</b> |                                     |                          |                                       |                          |         |
| HbA <sub>1c</sub> (mmol/mol)                           | 52                                  | 48 (46-65)               | 68                                    | 52 (44-69)               | 0.4     |
| HbA <sub>1c</sub> (%)                                  | 52                                  | 6.6 (6.3-8.1)            | 68                                    | 6.9 (6.2-8.5)            | 0.4     |
| Fasting glucose (mmol/l)                               | 23                                  | 5.1 (4.4-5.7)            | 29                                    | 5.5 (4.9-6.6)            | 0.09    |
| Fasting C-Peptide (nmol/l)                             | 42                                  | 0.20 (0.16-0.31)         | 47                                    | 0.22 (0.11-0.35)         | 0.8     |
| Insulin treatment                                      | 51                                  | 37 (72.5)                | 68                                    | 49 (72.1)                | 0.7     |
| Ketonuria (moderate/large)                             | 29                                  | 4 (13.8)                 | 25                                    | 8 (32.0)                 | 0.1     |
| DKA                                                    | 52                                  | 2 (3.8)                  | 66                                    | 1 (1.5)                  | 0.4     |
| pH                                                     | 31                                  | 7.40 (7.37-7.42)         | 37                                    | 7.40 (7.38-7.42)         | 0.8     |
| Symptoms                                               | 52                                  | 24 (46.2)                | 69                                    | 29 (42.0)                | 0.7     |
| Hospitalisation                                        | 52                                  | 39 (75.0)                | 69                                    | 51 (73.9)                | 0.9     |
| Days                                                   | 51                                  | 9 (0-12)                 | 66                                    | 8 (0-10)                 | 0.2     |
| Intensive care unit (yes)                              | 49                                  | 1 (2.0)                  | 59                                    | 1 (1.7)                  | 0.8     |

T1D: type 1 diabetes, DKA: diabetic ketoacidosis



**ESM Figure 1** Fr1da study participants

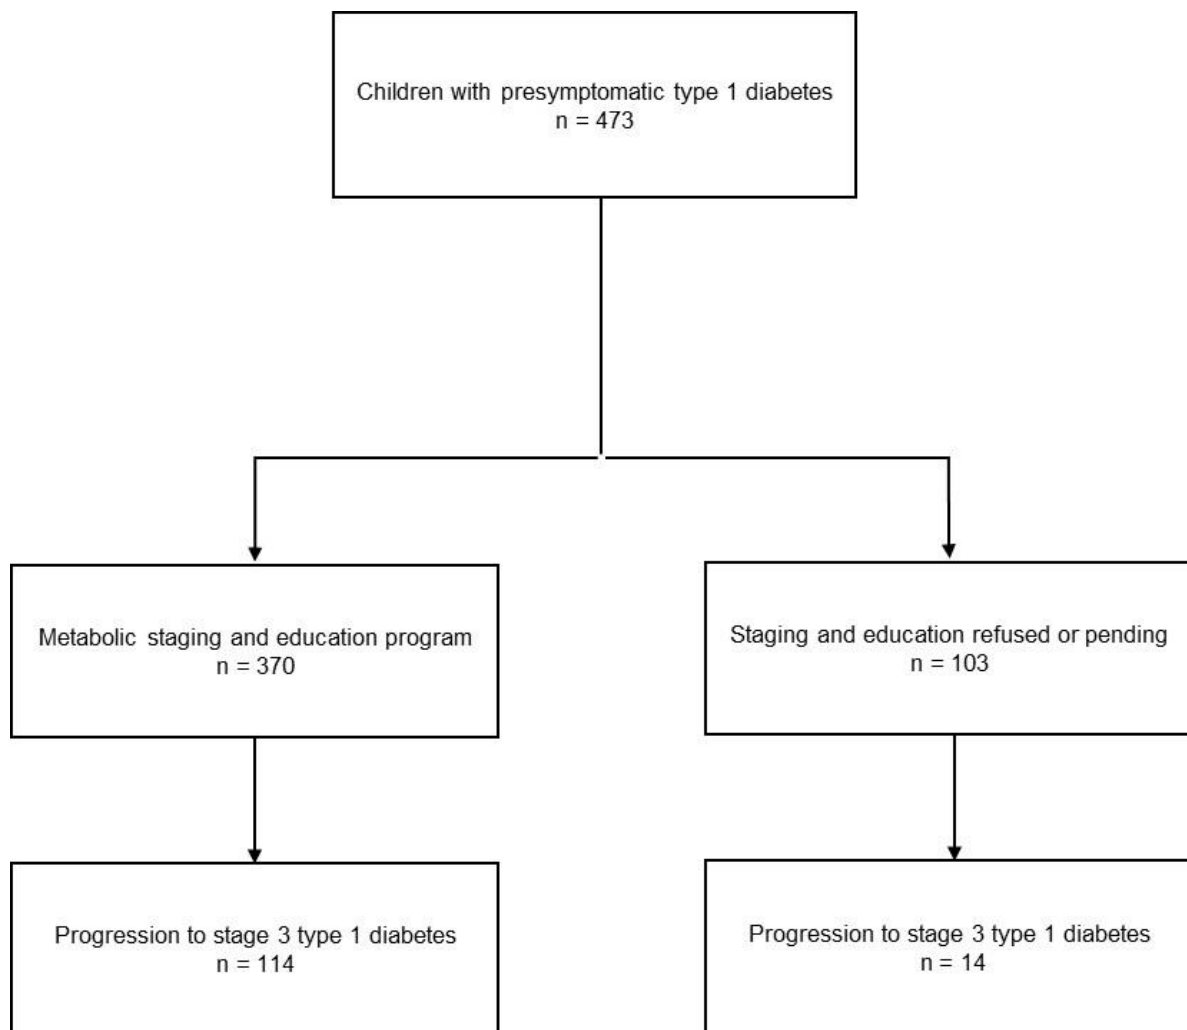

**ESM Figure 2** HbA<sub>1c</sub>, fasting glucose, fasting C-peptide and BMI-SDS at diagnosis of stage 3 type 1 diabetes are shown for children with a first-degree relative with type 1 diabetes previously diagnosed with presymptomatic type 1 diabetes in the Fr1da study compared with children with a first-degree relative with type 1 diabetes diagnosed with incident type 1 diabetes in the DiMelli study.

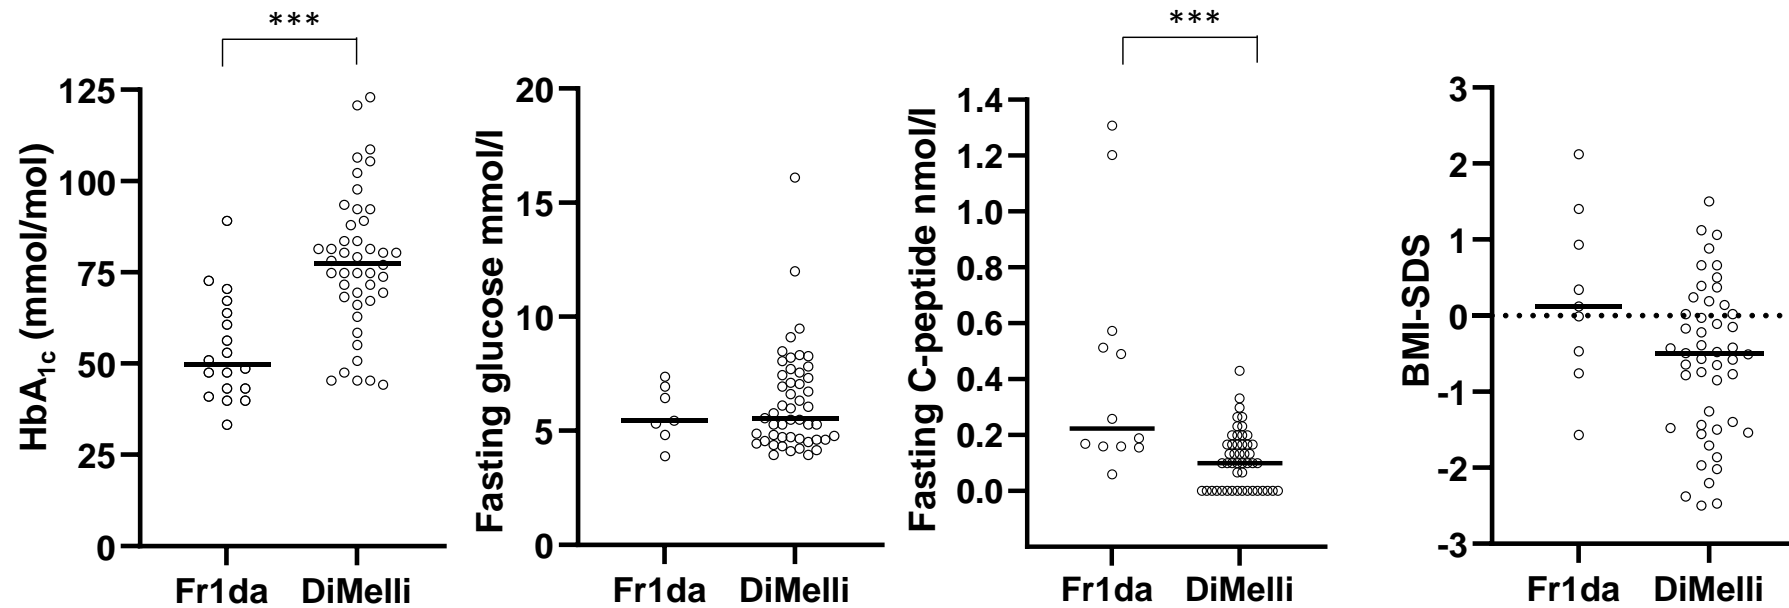

Supplement: MOESM1 [file 125_2023_5953_MOESM1_ESM.pdf]
